# Supplementary material
Source: PubMed Central journal article supplement (PMC7964300)
Supplement: 14-00588.pdf [file 14-00588.pdf]

**On-line Table 1: Scan parameters of our 7T MRI sequences**

| Parameter      | T1-TFE             | PD-SE           | T2-TSE          | T2*-TFE         |
|----------------|--------------------|-----------------|-----------------|-----------------|
| FOV (mm)       | 110 × 110 × 34     | 120 × 40 × 1    | 120 × 40 × 1    | 120 × 40 × 1    |
| Acq. Res. (mm) | 0.11 × 0.11 × 0.11 | 0.11 × 0.11 × 1 | 0.11 × 0.11 × 1 | 0.11 × 0.11 × 1 |
| TR/TI/TE (ms)  | 55/NA/6.0          | 3500/1100/12    | 3500/1100/51    | 3500/1100/15    |
| Imaging matrix | 1000 × 1000        | 1092 × 363      | 1092 × 357      | 1092 × 363      |
| Flip angle     | 25°                | 90°             | 90°             | 90°             |
| TSE/TFE factor | 1000               | NA              | 7               | 1               |
| NSA            | 1                  | 2               | 22              | 3               |
| T (hr:min:sec) | 3:39:22            | 0:42:28         | 1:05:34         | 1:03:29         |

**Note:**—Acq. Res. indicates acquired resolution; NSA, number of signal averages; T, time (duration); TFE, turbo field echo factor (the number of excitation pulses per inversion [T2], or between frequency drift corrections/adjustments [T1-TFE]); SE, spin-echo; TSE, turbo spin-echo factor (the number of echoes [lines in *k*-space] per excitation). An inversion time was used to null the gel signal; NA, not applicable.

**On-line Table 2: Overview of image contrast heterogeneity within the vessel wall on 7T MRI and its correlation with histology**

| Subject Sex, Age (yr) <sup>a</sup> | Artery               | Heterogeneity on MRI               | Signal Intensity <sup>b</sup> |     |     |     | Class <sup>c</sup> | Correlation MRI versus Histology         |
|------------------------------------|----------------------|------------------------------------|-------------------------------|-----|-----|-----|--------------------|------------------------------------------|
|                                    |                      |                                    | T1                            | PD  | T2  | T2* |                    |                                          |
| M, 87                              | R VA                 | Focal "spot" within wall           | ↓                             | ↓   | ↓   | ↓   | IT                 | Intima-media artifacts                   |
|                                    | MidBA                | Local inner rim                    | =                             | =   | ↓   | ↓   | FS                 | No correlation                           |
|                                    | R MCA                | Line within wall (almost circumf.) | ↓                             | ↓   | ↓   | ↓   | F                  | Intima-media artifacts/foamy macrophages |
|                                    |                      | Inner rim (almost circumf.)        | =                             | =   | ↑   | ↑   | F                  | Increased collagen                       |
|                                    | L MCA                | Thickening ("core")                | ↓                             | ↓   | =/↓ | =/↓ | FL                 | Lipid core                               |
|                                    |                      | Inner rim                          | =/↑                           | ↑   | ↑   | ↑   | FL                 | Increased collagen                       |
|                                    | R ICA                | Thin local line within wall        | ↓                             | ↓   | ↓   | ↓   | F                  | Intima-media artifacts/foamy macrophages |
|                                    |                      | Local thickening                   | ↑                             | =/↑ | ↑   | ↑   | F                  | No correlation                           |
|                                    |                      | Local area                         | ↓                             | =/↓ | =/↓ | ↓   | F                  | Foamy macrophages                        |
|                                    | L ICA                | Thick local inner rim              | =                             | ↑   | ↑   | ↑   | F                  | Increased collagen                       |
|                                    |                      | Line within wall (almost circumf.) | ↓                             | ↓   | ↓   | ↓   | F                  | Intima-media artifacts                   |
|                                    |                      | Local area                         | =/↑                           | ↓   | ↓   | ↓   | F                  | Foamy macrophages                        |
| F, 74                              | R VA                 | Local lines within wall            | =                             | ↓   | ↓   | ↓   | FS                 | Intima-media artifacts/foamy macrophages |
|                                    | Prox-BA              | Focal line within wall             | =                             | ↓   | ↓   | ↓   | IT                 | Intima-media artifacts                   |
|                                    | R PCA                | Local line within wall             | =                             | ↓   | ↓   | ↓   | FS                 | Intima-media artifacts                   |
|                                    |                      | Inner rim                          | ↑                             | ↑   | ↑   | ↑   | FS                 | No correlation                           |
|                                    | L PCA                | Patchy "spots" within wall         | =                             | ↓   | ↓   | ↓   | IT                 | Intima-media artifacts                   |
|                                    |                      | Focal inner rim "spots"            | =                             | =   | ↑   | ↑   | IT                 | No correlation                           |
|                                    | L MCA                | Thickening ("core")                | ↓                             | ↓   | ↓   | ↓   | Path.IT            | Foamy macrophages and proteoglycans      |
|                                    |                      | Inner rim                          | =                             | ↑   | ↑   | ↑   | Path.IT            | Increased collagen                       |
|                                    | R ICA                | Local line within wall             | =/↑                           | =/↑ | ↓   | ↓   | F                  | Intima-media artifacts                   |
|                                    |                      | Focal inner rim "spots"            | =                             | ↑   | ↓   | ↓   | F                  | Increased collagen                       |
|                                    | L ICA                | Line within wall                   | =                             | ↓   | ↓   | ↓   | IT                 | Intima-media artifacts                   |
|                                    | F, 65                | Prox-BA                            | Lines within wall             | =   | ↓   | ↓   | ↓                  | FS                                       |
| MidBA                              |                      | Patchy "spots" within wall         | ↑                             | ↑   | =/↑ | =/↑ | IT                 | No correlation                           |
| M, 54                              | L ICA                | Local line within wall             | =                             | ↓   | ↓   | ↓   | IT                 | No correlation                           |
|                                    |                      | Focal inner "spot"                 | ↑                             | ↑   | ↑   | ↑   | IT                 | No correlation                           |
| M, 71                              | R VA                 | Thickening ("core") 2 locations    | ↓                             | =   | =   | ↓   | F                  | Less collagen/artifacts                  |
|                                    |                      | Thick local inner rim 2 locations  | =                             | =   | ↑   | ↑   | F                  | Increased collagen                       |
|                                    | L VA                 | Local line within wall             | ↓                             | ↓   | ↓   | ↓   | F                  | Foamy macrophages                        |
|                                    |                      | Focal inner area                   | ↑                             | ↓   | ↓   | ↓   | F                  | Increased collagen                       |
|                                    | Dist-BA              | Focal protruding thickening        | ↑                             | ↑   | ↑   | ↑   | Path.IT            | Foamy macrophages and proteoglycans      |
|                                    | R ICA                | Thickening ("core")                | ↓                             | ↓   | ↓   | ↓   | Path.IT            | Foamy macrophages and proteoglycans      |
|                                    |                      | Local inner rim                    | =                             | =   | =   | =   | Path.IT            | Increased collagen                       |
| L ICA                              | Large thickened area | ↓                                  | ↓                             | ↓   | ↓   | F   | Foamy macrophages  |                                          |
|                                    |                      | Thin inner rim                     | ↑                             | ↓   | ↓   | ↓   | F                  | Increased collagen                       |

**Note:**—Circumf. indicates circumferential; MidBA, middle part of basilar artery; R, right; L, left; VA, vertebral artery; Prox-BA, proximal part of basilar artery; Dist-BA, distal part of basilar artery; =, isointense to surrounding healthy vessel wall; ↓, hypointense to surrounding healthy vessel wall; ↑, hyperintense to surrounding healthy vessel wall; PCA, posterior cerebral artery; F, fibrous plaque; FL, fibrolipid plaque; FS, fatty streak; IT, intimal thickening; Path.IT, pathologic intimal thickening.

<sup>a</sup> Sex and age at death of the 5 subjects in whom circle of Willis specimens were used in this study.

<sup>b</sup> Signal intensity of the described vessel wall lesion on each of the 4 image contrast weightings.

<sup>c</sup> Classification according to the modified American Heart Association classification by Virmani et al.<sup>25</sup>

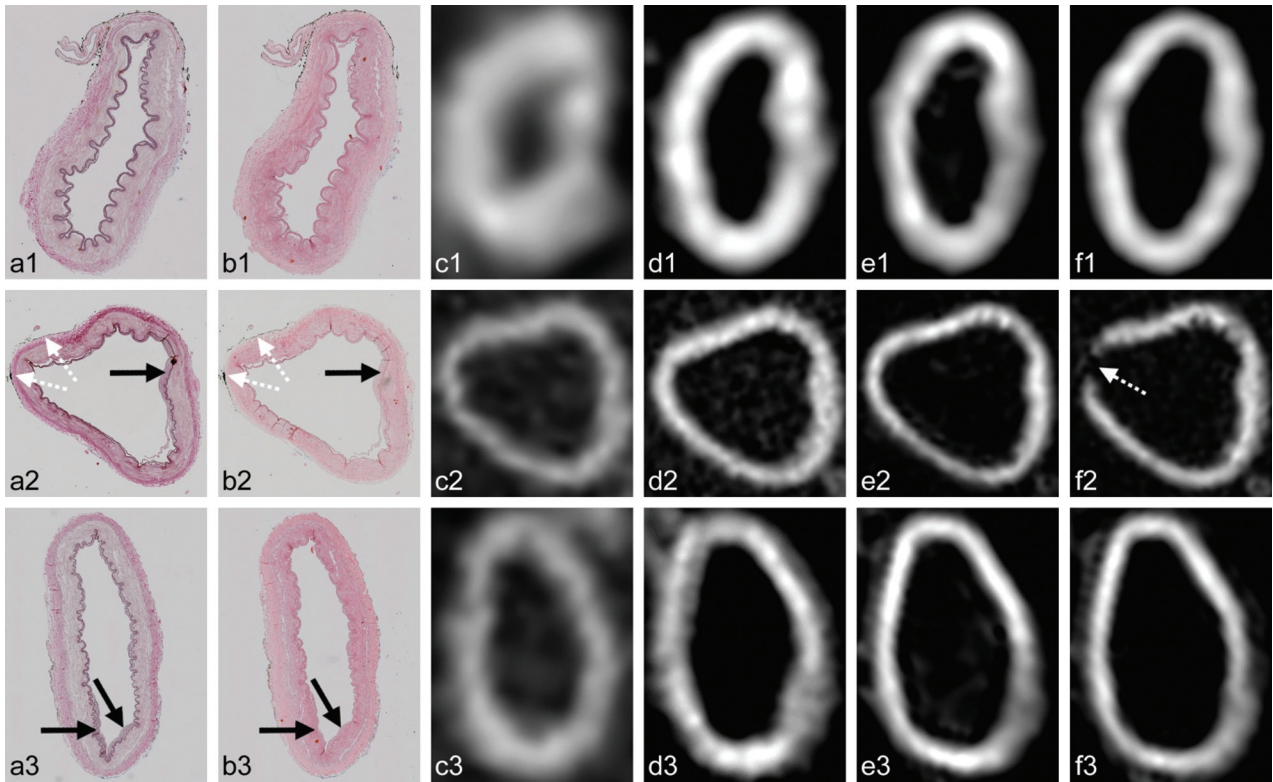

**ON-LINE FIGURE.** Three examples of no or early lesions without signal heterogeneity on 7T MR images. Histologic sections (magnification  $\times 10$ ) with Van Gieson elastic (a) and H&E (b) staining, with corresponding 7T MR images of the T1-weighted (c), PD-weighted (d), T2-weighted (e), and T2\*-weighted (f) sequences. *a1–f1*, Cross-section of the left posterior cerebral artery of subject 4. Histologic examination shows no anomalies, reflected in a homogeneous signal intensity throughout the whole vessel wall on all sequences. *a2–f2*, Cross-section of the right MCA of subject 2. Histologic examination shows intimal thickening (black arrow in *a2* and *b2*), which is not seen as signal heterogeneity of the vessel wall on MR images. Artifacts from the fiducial can be seen on the T2\*-weighted image (*f2*), corresponding to black ink on the histologic sections (dashed white arrows, *a2* and *b2*). *a3–f3*, Cross-section of the left vertebral artery of subject 1. Histologic examination shows intimal thickening (black arrows in *a3* and *b3*), which is not seen as signal heterogeneity of the vessel wall on the MR images.
